# Supplementary material
Source: PubMed Central journal article supplement (PMC3215006)
Supplement: 1111597108_pnas.201111597SI.pdf [file 1111597108_pnas.201111597SI.pdf]

# Supporting Information

Liu et al. 10.1073/pnas.1111597108

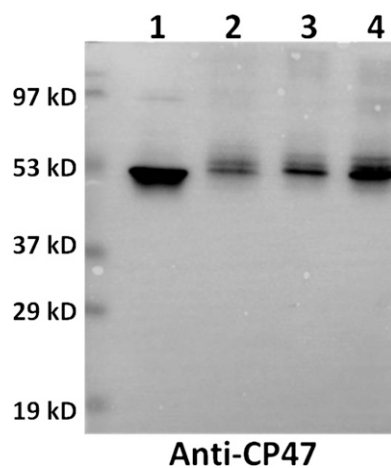

**Fig. S1.** Probing of cross-linked photosystem II (PSII) samples with anti-CP47 antibodies: 1, His27 $\Delta$ ctpA; 2, His27 $\Delta$ ctpA + EDC; 3, HT3 $\Delta$ ctpA + EDC; 4, HT3 $\Delta$ ctpA $\Delta$ psb27 + EDC.

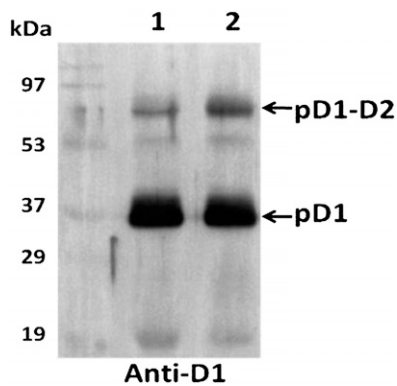

**Fig. S2.** Probing of cross-linked PSII samples with anti-D1 antibodies: 1, His27 $\Delta$ ctpA without EDC treatment; 2, His27 $\Delta$ ctpA with EDC treatment. Precursor D1 (pD1) protein and pD1-D2 aggregate are indicated.
